# Supplementary material for: Combining Polyhedral Approaches and Stochastic Dual Dynamic Integer Programming for Solving the Uncapacitated Lot-Sizing Problem Under Uncertainty
Source: Atypon-hosted journal article supplement (doi:10.1287/ijoc.2021.1118), 2021-12-09
Supplement: ijoc.2021.1118.sm1.pdf [file ijoc.2021.1118.sm1.pdf]

# *Online supplement for “Combining polyhedral approaches and stochastic dual dynamic integer programming for solving the uncapacitated lot-sizing problem under uncertainty”*

Franco Quezada

Sorbonne Université, LIP6, franco.quezada@lip6.fr,  
Universidad de Santiago de Chile, LDSPS, franco.quezada@usach.cl,

Céline Gicquel

Université Paris Saclay, LISN, celine.gicquel@lri.fr,

Safia Kedad-Sidhoum

CNAM, CEDRIC, safia.kedad\_sidhoum@cnam.fr,

This online supplement provides some complementary knowledge to the work presented in the paper “Combining polyhedral approaches and stochastic dual dynamic integer programming for solving the uncapacitated lot-sizing problem under uncertainty”. First, it recalls two classes of valid inequalities used to strengthen the mixed-integer linear programming formulation of the stochastic uncapacitated lot-sizing problem. Second, a small numerical example is provided. This one illustrates how alternative strengthened Benders’ cuts can be generated by using alternative mixed-integer linear programming formulations for the sub-problems. It also shows that these alternative strengthened Benders’ cuts do not necessarily dominate each other. Third, the proposed extSDDiP algorithm is described in detail. Finally, extensive numerical results showing the individual impact of each of the three main elements of the proposed extSDDiP algorithm are provided. Note that, unless otherwise noted, all section, page, paragraph, equation, table, and figure numbers of this online supplement refer to the main paper.

*Key words:* Multi-stage stochastic programming, stochastic lot-sizing, stochastic dual dynamic integer programming, node aggregation, valid inequalities, partial decomposition.

---

## Appendix A: Strengthening of the extensive MILP formulation

This section recalls previously published results on the polyhedral structure of the extensive formulation (1)-(4) and their use to strengthen its linear relaxation.

Formulation (1)-(4) can be strengthened by applying valid inequalities known for the deterministic ULS to each path of the scenario tree.

PROPOSITION 1. *Guan et al. (2006b).*

Given  $\ell \in \mathcal{V}$  and  $S \subseteq \mathcal{P}(1, \ell)$ , the following  $(\ell, S)$  inequality is valid for problem (1)-(4):

$$s^0 + \sum_{n \in S} x^n + \sum_{n \in \bar{S}} d^{n\ell} y^n \geq d^{1\ell} \quad (31)$$

with  $d^{n\ell} = \sum_{m \in \mathcal{P}(n, \ell)} d^m$  and  $\bar{S} = \mathcal{P}(1, \ell) \setminus S$ .

For the deterministic ULS, the  $(\ell, S)$  inequalities provide a full description of the convex hull of the feasible space. It is however not the case for the SULS. Guan et al. (2009) thus proposed to further strengthen formulation (1)-(4) by exploiting its tree structure.

PROPOSITION 2. *Guan et al. (2009).*

Given a subset  $\mathcal{O} = \{n_1, \dots, n_{\mathcal{O}}\} \subseteq \mathcal{V}$  which is partially ordered such that  $0 = d^{1n_0} \leq d^{1n_1} \leq \dots \leq d^{1n_{\mathcal{O}}}$  and a subset  $S_{\mathcal{O}}$  of nodes belonging to  $\cup_{o=1 \dots \mathcal{O}} \mathcal{P}(1, n_o)$ , the following inequality is valid for problem (1)-(4):

$$s^0 + \sum_{n \in S_{\mathcal{O}}} x^n + \sum_{n \in \bar{S}_{\mathcal{O}}} \Delta_n(\mathcal{O}) y^n \geq d^{1n_{\mathcal{O}}} \quad (32)$$

with  $\Delta_n(\mathcal{O}) = \sum_{m_o \in \mathcal{O} \cap \mathcal{V}(n)} (d^{1m_o} - d^{1m_o-1})$ .

Note that inequalities (31) can be seen as a special case of inequalities (32) in which  $\mathcal{O}$  comprises a single node  $\ell$ . Guan et al. (2006a) showed that a particular case of inequalities (32) suffices to fully describe the convex hull of the two-period SULS. However, this is not the case anymore when more than two planning periods are involved in the problem.

The number of valid inequalities (31) and (32) is too large to allow adding all of them a priori to formulation (1)-(4). Hence, a cutting-plane generation strategy is needed to add only a subset of these valid inequalities into the formulation. Consequently, the corresponding separation problems must be solved in order to identify which inequalities should be incorporated in the formulation. For inequalities (31), the separation problem can be solved exactly by the polynomial time algorithm proposed by Barany et al. (1984). For inequalities (32), the complexity status of the separation problem remains unknown but Guan et al. (2009) proposed a heuristic separation algorithm.

## Appendix B: Generation of strengthened Benders' cuts using alternative MILP formulations of the sub-problems

This section provides additional insights about the generation of additional strengthened Benders' cuts using alternative MILP formulations of the sub-problems. We present a numerical example illustrating the fact that there is no dominance between the strengthened Benders' cuts generated while using different MILP formulations of the SULS. To do this, we use formulation (21)-(25) rather than formulation (9)-(17). It namely has a single continuous state variable at each node, which facilitates the graphic representation of the approximation of the expected cost-to-go function.

EXAMPLE 1. Consider the following scenario tree involving  $\mathcal{S} = 4$  stages and  $R^\sigma = 3$  realizations at stages 2 to 4. Each realization is described by its stage  $\sigma$  and its realization index  $r \in \{1, 2, 3\}$ . The structure of the scenario tree is provided in Figure 1 and the corresponding values of the uncertain parameters are provided in Table 5.

| $(\sigma, r)$ | $d$ | $f$  | $g$ | $h$ |
|---------------|-----|------|-----|-----|
| (1,1)         | 87  | 934  | 10  | 0   |
| (2,1)         | 69  | 1182 | 20  | 10  |
| (2,2)         | 38  | 585  | 13  | 2   |
| (2,3)         | 73  | 1259 | 11  | 1   |
| (3,1)         | 7   | 1743 | 18  | 5   |
| (3,2)         | 86  | 956  | 20  | 6   |
| (3,3)         | 23  | 108  | 12  | 10  |
| (4,1)         | 14  | 643  | 3   | 6   |
| (4,2)         | 11  | 1583 | 9   | 0   |
| (4,3)         | 91  | 1074 | 13  | 10  |

Table 5 Numerical values for Example 1

Let us consider a partial decomposition involving  $\Gamma = 2$  macro-stages with  $\mathcal{S}(1) = \{1, 2\}$  and  $\mathcal{S}(2) = \{3, 4\}$ . At macro-stage  $\gamma = 1$ , we have a single realization  $\mathcal{X}^{1,1} = \{(1, 1), (2, 1), (2, 2), (2, 3)\}$ . At macro-stage  $\gamma = 2$ , we have 3 realizations:  $\mathcal{X}^{2,1} = \{(3, 1), (4, 1), (4, 2), (4, 3)\}$ ,  $\mathcal{X}^{2,2} = \{(3, 2), (4, 1), (4, 2), (4, 3)\}$ ,  $\mathcal{X}^{2,3} = \{(3, 3), (4, 1), (4, 2), (4, 3)\}$ .

At the first iteration of Algorithm 1, as  $\psi_1^1 \equiv 0$ , the feasible solution obtained at the end of the forward step is such that the leaving inventory at nodes (2, 1), (2, 2) and (2, 3) is equal to 0. The strengthened Benders' cuts generated during the backward step of the first iteration of Algorithm 1 to approximate  $\mathcal{Q}^1(s^\ell)$  are provided below:

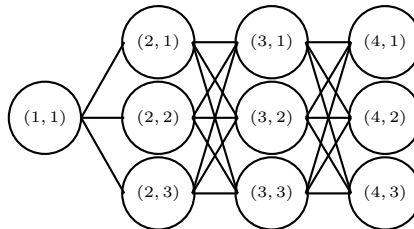

Figure 1 Scenario tree structure for Example 1

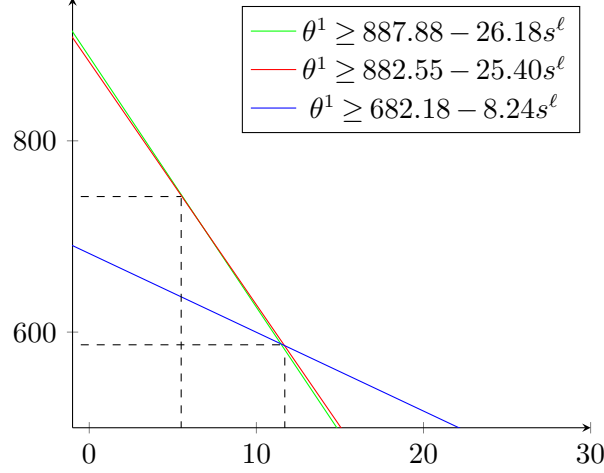

**Figure 2** Illustration for Example 1.

- by solving the LP relaxation of sub-problems  $\tilde{P}_1^2(0, 0, \mathcal{X}^{2,r}, IF(\emptyset))$ ,  $r \in \{1, 2, 3\}$ :

$$\theta^1 \geq 682.18 - 8.24s^\ell \quad (33)$$

- by solving the LP relaxation of sub-problems  $\tilde{P}_1^2(0, 0, \mathcal{X}^{2,r}, IF(\phi_1^{2,r}))$ ,  $r \in \{1, 2, 3\}$ , in which  $\phi_1^{2,r}$  contains only path inequalities (31):

$$\theta^1 \geq 882.55 - 25.40s^\ell \quad (34)$$

- by solving the LP relaxation of sub-problems  $\tilde{P}_1^2(0, 0, \mathcal{X}^{2,r}, IF(\phi_1^{2,r}))$ ,  $r \in \{1, 2, 3\}$ , in which  $\phi_1^{2,r}$  contains both path inequalities (31) and tree inequalities (32):

$$\theta^1 \geq 887.88 - 26.18s^\ell \quad (35)$$

Figure 1 provides a graphic representation of the three generated cuts. We observe that there is no dominance amongst them, i.e. none of the cuts seems to provide a better approximation of the expected cost-to-go function for all possible values of the leaving inventory level  $s^\ell$ . More specifically, when  $s^\ell$  lies in the interval  $[1, 7]$ , the best approximation is obtained by the cut generated using formulation  $IF(\phi_i^{\gamma,r})$  strengthened by inequalities (31) and (32). When  $s^\ell$  lies in  $[7, 12]$ , the best approximation is obtained by the cut generated using formulation  $IF(\phi_i^{\gamma,r})$  strengthened only by inequalities (31). Finally, when  $s^\ell$  is greater than 12, the best approximation is obtained by the cut generated using formulation  $IF(\emptyset)$ . This shows the practical interest of generating strengthened Benders' cuts based on alternative MILP formulation of the sub-problems.

**Appendix C: Detailed description of the proposed extSDDiP****Algorithm 1:** Strengthening sub-problems algorithm

---

```

1 if  $\lambda = 0$  then
2   |  $F = IF(\emptyset)$ 
3 else if  $\lambda = 1$  then
4   | Run the cutting plane procedure to generate path inequalities (31)
5   | Add the generated inequalities to  $\phi_i^{\gamma,r}$  to get  $\phi_{i+1}^{\gamma,r}$ 
6   |  $F = IF(\phi_i^{\gamma,r})$ 
7 else if  $\lambda = 2$  then
8   | Run the cutting plane procedure to generate tree inequalities (32)
9   | Add the generated inequalities to  $\phi_i^{\gamma,r}$  to get  $\phi_{i+1}^{\gamma,r}$ 
10  |  $F = IF(\phi_i^{\gamma,r})$ 

```

---

**Algorithm 2:** Approximate extSDDiP algorithm

---

```

1 while no stopping criterion is satisfied do
2   | Randomly select  $K$  scenarios  $\Omega_i = \{\omega_i^1, \dots, \omega_i^K\}$ 
3   | for  $k = 1, \dots, K$  do
4     | for  $\gamma = 1, \dots, \Gamma$  do
5       | Solve  $\tilde{P}_i^\gamma(s_i^m, \tilde{\psi}_i^\gamma, \mathcal{X}^{\gamma, r_i^{k,\gamma}}, IF(\phi_i^{\gamma,r}))$  for  $m = \omega_i^k \cap \mathcal{V}^{t'(\gamma-1)}$ 
6       | Record  $s_i^\ell$  for  $\ell = \omega_i^k \cap \mathcal{L}(\gamma, r_i^{k,\gamma})$ 
7     | end
8   | end
9   | for  $\gamma = \Gamma - 1, \dots, 1$  do
10    | for  $k = 1, \dots, K$  do
11      | for  $r \in \mathcal{R}^{\gamma+1}$  do
12        | Let  $m = \omega_i^k \cap \mathcal{V}^{t'(\gamma)}$ 
13        | Run Algorithm 1
14        | Solve the Linear relaxation of  $\tilde{P}_i^{\gamma+1}(s_i^m, \tilde{\psi}_{i+1}^{\gamma+1}, \mathcal{X}^{\gamma+1,r}, F(\phi_{i+1}^{\gamma,r}))$  and collect the
15          | coefficients of the strengthened Benders' cut
16        | Solve the Lagrangian relaxation of  $\tilde{P}_i^{\gamma+1}(s_i^m, \tilde{\psi}_{i+1}^{\gamma+1}, \mathcal{X}^{\gamma+1,r}, F(\phi_{i+1}^{\gamma,r}))$  and collect the
17          | constant value of the strengthened Benders' cut
18      | end
19      | Add the generated cut to  $\tilde{\psi}_i^\gamma$  to get  $\tilde{\psi}_{i+1}^\gamma$ 
20    | end
21    | if a criterion for Algorithm 1 is satisfied then
22      |  $\lambda \leftarrow \lambda + 1$ 
23    | end
24    |  $LB \leftarrow \tilde{Q}_{i+1}^{1,1}(0)$ 
25    |  $i \leftarrow i + 1$ 
26  | end
27 end

```

---

**Algorithm 3:** extSDDiP algorithm

---

```

1 Initialize  $LB \leftarrow -\infty, UB \leftarrow +\infty, i \leftarrow 1, \lambda \leftarrow 0$ 
2 for  $\gamma = \Gamma - 1, \dots, 1$  do
3   for  $r \in \mathcal{R}^{\gamma+1}$  do
4     Initialize  $\phi^{\gamma,r} \leftarrow \emptyset$ 
5   end
6 end
7 Run Algorithm 2
8 while no stopping criterion is satisfied do
9   Randomly select  $K$  scenarios  $\Omega_i = \{\omega_i^1, \dots, \omega_i^K\}$ 
10  for  $k = 1, \dots, K$  do
11    for  $\gamma = 1, \dots, \Gamma$  do
12      Solve  $\hat{P}_i^\gamma(u_i^m, \psi_i^\gamma, \mathcal{X}^{\gamma, r_i^{k,\gamma}}, IF(\phi_i^{\gamma,r}))$  for  $m = \omega_i^k \cap \mathcal{V}^{t'(\gamma-1)}$ .
13      Record  $u_i^\ell$  for  $\ell = \omega_i^k \cap \mathcal{L}(\gamma, r_i^{k,\gamma})$ 
14    end
15     $v^k \leftarrow \sum_{n \in \omega_i^k} (f^n y_i^n + h^n s_i^n + g^n x_i^n)$ 
16  end
17   $\hat{\mu} \leftarrow \sum_{k=1}^K v^k$  and  $\hat{\chi}^2 \leftarrow \frac{1}{K-1} \sum_{k=1}^K (v^k - \hat{\mu})^2$ 
18   $UB \leftarrow \hat{\mu} + z_{\alpha/2} \frac{\hat{\chi}}{\sqrt{K}}$ 
19  for  $\gamma = \Gamma - 1, \dots, 1$  do
20    for  $k = 1, \dots, K$  do
21      for  $r \in \mathcal{R}^{\gamma+1}$  do
22        Let  $m = \omega_i^k \cap \mathcal{V}^{t'(\gamma)}$ 
23        Run Algorithm 1
24        Solve the Linear relaxation of  $\hat{P}_i^{\gamma+1}(u_i^m, \psi_{i+1}^{\gamma+1}, \mathcal{X}^{\gamma+1,r}, F(\phi_{i+1}^{\gamma,r}))$  and collect the
          coefficients of the strengthened Benders' cut
25        Solve the Lagrangian relaxation of  $\hat{P}_i^{\gamma+1}(u_i^m, \psi_{i+1}^{\gamma+1}, \mathcal{X}^{\gamma+1,r}, F(\phi_{i+1}^{\gamma,r}))$  and collect the
          constant value of the strengthened Benders' cut
26        Solve  $\hat{P}_i^{\gamma+1}(u_i^m, \psi_{i+1}^{\gamma+1}, \mathcal{X}^{\gamma+1,r}, F(\phi_{i+1}^{\gamma,r}))$  and collect the coefficients of the integer
          optimality cut
27        -Solve the Lagrangian dual problem and collect the coefficients of the Lagrangian cut
28      end
29      Add the 3 generated cuts to  $\psi_i^\gamma$  to get  $\psi_{i+1}^\gamma$ 
30    end
31    if a criterion for Algorithm 1 is satisfied then
32       $\lambda \leftarrow \lambda + 1$ 
33    end
34     $LB \leftarrow \hat{Q}_{i+1}^{1,1}(0)$ 
35     $i \leftarrow i + 1$ 
36  end
37 end

```

---

## Appendix D: Computational assessment of the various components of the extSDDiP algorithm

This section provides the results of additional computational experiments carried out in order to assess the individual impact of each of the three main elements of algorithm extSDDiP, namely the partial decomposition of the stochastic problem into smaller stochastic sub-problems, the introduction of an initial phase in which the state variables are kept continuous and the exploitation of alternative MILP formulations of the stochastic sub-problems to generate additional strengthened Benders's cuts, on its overall performance.

Tables 6-9 provide the results obtained while running extSDDiP-I, i.e. running only the approximate sub-tree based algorithm. Tables 10-13 provide the results obtained while running extSDDiP-II, i.e. running only Algorithm 1 without an initial phase based on the approximate sub-tree based algorithm.

**Table 6** Performance of the approximate algorithm at solving instances from Set 1 ( $\Sigma = 4, b = 1$ ) of the SULTS

|     |                 |                    | problem |              |       |          |       |       |
|-----|-----------------|--------------------|---------|--------------|-------|----------|-------|-------|
| $R$ | $ \mathcal{V} $ | $ \mathcal{L}(1) $ | $G$     | Method       | Gap   | Time (s) | # ite | # VI  |
| 10  | 1111            | 1000               | 1       | SDDiP        | 9.59  | 1,100.96 | 135   | 0     |
|     |                 |                    | 2       | extSDDiP-I-0 | 9.44  | 7.42     | 16    | 0     |
|     |                 |                    |         | extSDDiP-I-1 | 6.55  | 12.56    | 33    | 92    |
|     |                 |                    |         | extSDDiP-I-2 | 5.61  | 21.26    | 64    | 678   |
|     |                 |                    | 4       | CPX          | 1.36  | 1590     | -     | 2642  |
| 20  | 8420            | 8000               | 1       | SDDiP        | 15.62 | 1,074.37 | 77    | 0     |
|     |                 |                    | 2       | extSDDiP-I-0 | 8.28  | 25.40    | 18    | 0     |
|     |                 |                    |         | extSDDiP-I-1 | 5.25  | 36.50    | 35    | 377   |
|     |                 |                    |         | extSDDiP-I-2 | 4.43  | 75.93    | 86    | 5,545 |
|     |                 |                    | 4       | CPX          | 4.67  | 1,801    | -     | 3224  |

**Table 7** Performance of the approximate algorithm at solving instances from Set 2 ( $\Sigma = 6, b = 1$ ) of the SULTS

|     |                    |                    | problem |              |       |          |       |        |
|-----|--------------------|--------------------|---------|--------------|-------|----------|-------|--------|
| $R$ | $ \mathcal{V} $    | $ \mathcal{L}(1) $ | $G$     | Method       | Gap   | Time (s) | # ite | # VI   |
| 10  | 111111             | 100000             | 1       | SDDiP        | 21.49 | 1,241.18 | 80    | 0      |
|     |                    |                    | 2       | extSDDiP-I-0 | 13.91 | 23.22    | 23    | 0      |
|     |                    |                    |         | extSDDiP-I-1 | 8.93  | 44.99    | 54    | 286    |
|     |                    |                    |         | extSDDiP-I-2 | 6.73  | 104.13   | 101   | 1,563  |
|     |                    |                    | 3       | extSDDiP-I-0 | 7.66  | 146.98   | 18    | 0      |
|     |                    |                    |         | extSDDiP-I-1 | 4.85  | 288.06   | 38    | 1,886  |
|     |                    |                    |         | extSDDiP-I-2 | 4.56  | 787.07   | 71    | 20,829 |
|     |                    |                    | 6       | CPX          | 19.28 | 1801     | -     | 0      |
| 20  | $3.36 \times 10^6$ | $3.2 \times 10^6$  | 1       | SDDiP        | 28.77 | 1,214.26 | 46    | 0      |
|     |                    |                    | 2       | extSDDiP-I-0 | 15.47 | 71.33    | 30    | 0      |
|     |                    |                    |         | extSDDiP-I-1 | 8.88  | 198.51   | 67    | 1,132  |
|     |                    |                    |         | extSDDiP-I-2 | 7.95  | 621.07   | 137   | 11,762 |
|     |                    |                    | 3       | extSDDiP-I-0 | 10.67 | 1,349.91 | 8     | 0      |
|     |                    |                    |         | extSDDiP-I-1 | 10.75 | 1,369.64 | 7     | 0      |
|     |                    |                    |         | extSDDiP-I-2 | 11.81 | 1,386.40 | 7     | 0      |
|     |                    |                    | 6       | CPX          | 94.24 | 1,801    | -     | 0      |

**Table 8** Performance of the approximate algorithm at solving instances from Set 3 ( $\Sigma = 8, R = 5$ ) of the SULS

| $b$ | $ \mathcal{V} $ | $ \mathcal{L}(1) $ | $G$ | Method       | Gap   | Time (s) | # ite | # VI   |
|-----|-----------------|--------------------|-----|--------------|-------|----------|-------|--------|
| 2   | 195312          | 78125              | 1   | SDDiP        | 20.08 | 1662.00  | 91    | 0      |
|     |                 |                    | 2   | extSDDiP-I-0 | 15.16 | 40.83    | 21    | 0      |
|     |                 |                    |     | extSDDiP-I-1 | 6.61  | 55.23    | 52    | 432    |
|     |                 |                    |     | extSDDiP-I-2 | 6.30  | 76.85    | 84    | 1,002  |
|     |                 |                    | 4   | extSDDiP-I-0 | 7.04  | 676.63   | 13    | 0      |
|     |                 |                    |     | extSDDiP-I-1 | 3.49  | 1,011.61 | 28    | 6,008  |
|     |                 |                    |     | extSDDiP-I-2 | 3.12  | 1,285.02 | 32    | 7,975  |
|     |                 |                    | 8   | CPX          | 43.81 | 1,802.40 | -     | 0      |
|     |                 |                    | 5   | 488280       | 78125 | 1        | SDDiP | 13.14  |
| 2   | extSDDiP-I-0    | 13.73              |     |              |       | 113.42   | 21    | 0      |
|     | extSDDiP-I-1    | 2.56               |     |              |       | 130.48   | 49    | 2,196  |
|     | extSDDiP-I-2    | 2.58               |     |              |       | 163.25   | 65    | 3,746  |
| 4   | extSDDiP-I-0    | 6.39               |     |              |       | 1,179.24 | 12    | 0      |
|     | extSDDiP-I-1    | 3.12               |     |              |       | 1,739.40 | 18    | 19,857 |
|     | extSDDiP-I-2    | 2.89               |     |              |       | 1,765.80 | 19    | 21,455 |
| 8   | CPX             | 71.04              |     |              |       | 1,803.99 | -     | 0      |

**Table 9** Performance of the approximate algorithm at solving instances from Set 4 ( $\Sigma = 12, R = 3, b = 1$ ) of the SULS

| $ \mathcal{V} $ | $ \mathcal{L}(1) $ | $G$   | Method       | Gap   | Time (s) | # ite | # VI  |
|-----------------|--------------------|-------|--------------|-------|----------|-------|-------|
| 265720          | 177147             | 1     | SDDiP        | 29.12 | 1,716.06 | 100   | 0     |
|                 |                    | 2     | extSDDiP-I-0 | 24.01 | 73.32    | 20    | 0     |
|                 |                    |       | extSDDiP-I-1 | 11.15 | 88.51    | 53    | 86    |
|                 |                    |       | extSDDiP-I-2 | 10.32 | 104.50   | 81    | 137   |
|                 |                    | 3     | extSDDiP-I-0 | 15.78 | 23.95    | 19    | 0     |
|                 |                    |       | extSDDiP-I-1 | 7.87  | 36.14    | 47    | 235   |
|                 |                    |       | extSDDiP-I-2 | 6.43  | 59.33    | 84    | 775   |
|                 |                    | 4     | extSDDiP-I-0 | 12.82 | 74.63    | 17    | 0     |
|                 |                    |       | extSDDiP-I-1 | 4.84  | 99.06    | 38    | 627   |
|                 |                    |       | extSDDiP-I-2 | 4.80  | 196.46   | 64    | 2,535 |
|                 |                    | 6     | extSDDiP-I-0 | 7.72  | 1,009.62 | 10    | 0     |
|                 |                    |       | extSDDiP-I-1 | 4.25  | 1,275.45 | 18    | 3,323 |
|                 | extSDDiP-I-2       | 4.11  | 1,361.15     | 23    | 4,747    |       |       |
| 12              | CPX                | 53.78 | 1,803.29     | -     | 0        |       |       |

**Table 10** Performance of Algorithm 1 at solving instances from Set 1 ( $\Sigma = 4, b = 1$ ) of the SULS problem

| $R$ | $ \mathcal{V} $ | $ \mathcal{L}(1) $ | $G$ | Method | Gap           | Time (s) | # ite  | # VI |       |
|-----|-----------------|--------------------|-----|--------|---------------|----------|--------|------|-------|
| 10  | 1111            | 1000               | 1   | SDDiP  | 9.59          | 1,100.96 | 135    | 0    |       |
|     |                 |                    |     | 2      | extSDDiP-II-0 | 4.86     | 951.89 | 74   | 0     |
|     |                 |                    |     |        | extSDDiP-II-1 | 3.00     | 908.93 | 77   | 879   |
|     |                 |                    |     |        | extSDDiP-II-2 | 3.16     | 928.67 | 72   | 875   |
|     |                 |                    | 4   | CPX    | 1.36          | 1590     | -      | 2642 |       |
| 20  | 8420            | 8000               | 1   | SDDiP  | 15.62         | 1,074.37 | 77     | 0    |       |
|     |                 |                    |     | 2      | extSDDiP-II-0 | 5.54     | 971.92 | 42   | 0     |
|     |                 |                    |     |        | extSDDiP-II-1 | 3.58     | 961.21 | 41   | 5,075 |
|     |                 |                    |     |        | extSDDiP-II-2 | 3.70     | 958.20 | 41   | 5,068 |
|     |                 |                    | 4   | CPX    | 4.67          | 1,801    | -      | 3224 |       |

**Table 11** Performance of Algorithm 1 at solving instances from Set 2 ( $\Sigma = 6, b = 1$ ) of the SULS problem

| $R$ | $ \mathcal{V} $ | $ \mathcal{L}(1) $ | $G$ | Method             | Gap               | Time (s) | # ite         | # VI  |          |    |       |
|-----|-----------------|--------------------|-----|--------------------|-------------------|----------|---------------|-------|----------|----|-------|
| 10  | 111111          | 100000             | 1   | SDDiP              | 21.49             | 1,241.18 | 80            | 0     |          |    |       |
|     |                 |                    |     | 2                  | extSDDiP-II-0     | 12.42    | 1,182.40      | 25    | 0        |    |       |
|     |                 |                    |     |                    | extSDDiP-II-1     | 9.21     | 1,187.84      | 25    | 1,400    |    |       |
|     |                 |                    |     |                    |                   |          | extSDDiP-II-2 | 8.84  | 1,176.92 | 25 | 1,389 |
|     |                 |                    | 3   | extSDDiP-II-0      | 7.68              | 1,086.78 | 21            | 0     |          |    |       |
|     |                 |                    |     |                    | extSDDiP-II-1     | 6.11     | 1,179.83      | 15    | 10,557   |    |       |
|     |                 |                    |     |                    | extSDDiP-II-2     | 5.27     | 1,167.99      | 15    | 10,489   |    |       |
|     |                 |                    |     |                    |                   | 6        | CPX           | 19.28 | 1801     | -  | 0     |
|     |                 |                    | 20  | $3.36 \times 10^6$ | $3.2 \times 10^6$ | 1        | SDDiP         | 28.77 | 1,214.26 | 46 | 0     |
| 2   | extSDDiP-II-0   | 17.35              |     |                    |                   |          | 1,118.36      | 11    | 0        |    |       |
|     | extSDDiP-II-1   | 17.50              |     |                    |                   |          | 1,274.20      | 10    | 4,081    |    |       |
|     |                 |                    |     |                    |                   |          | extSDDiP-II-2 | 16.85 | 1,268.43 | 9  | 3,957 |
| 3   | extSDDiP-II-0   | -                  |     |                    |                   | -        | -             | -     |          |    |       |
|     |                 | extSDDiP-II-1      |     |                    |                   | -        | -             | -     | -        |    |       |
|     |                 | extSDDiP-II-2      |     |                    |                   | -        | -             | -     | -        |    |       |
|     |                 |                    |     |                    |                   | 6        | CPX           | 94.24 | 1,801    | -  | 0     |

**Table 12** Performance of Algorithm 1 at solving instances from Set 3 ( $\Sigma = 8, R = 5$ ) of the SULLS problem

| $b$     | $ \mathcal{V} $ | $ \mathcal{L}(1) $ | $G$ | Method        | Gap   | Time (s) | # ite | # VI   |
|---------|-----------------|--------------------|-----|---------------|-------|----------|-------|--------|
| 2       | 195312          | 78125              | 1   | SDDiP         | 20.08 | 1662.00  | 91    | 0      |
|         |                 |                    |     | SDDiP-1       | 9.72  | 1,617.19 | 115   | 121    |
|         |                 |                    | 2   | extSDDiP-II-0 | 13.42 | 1,653.96 | 33    | 0      |
|         |                 |                    |     | extSDDiP-II-1 | 6.93  | 1,665.12 | 37    | 1,106  |
|         |                 |                    |     | extSDDiP-II-2 | 7.21  | 1,667.20 | 35    | 1,101  |
|         |                 |                    | 4   | extSDDiP-II-0 | 6.91  | 1,475.52 | 13    | 0      |
|         |                 |                    |     | extSDDiP-II-1 | 9.29  | 1,645.23 | 9     | 10,933 |
|         |                 |                    |     | extSDDiP-II-2 | 8.80  | 1,632.74 | 9     | 11,075 |
|         |                 |                    | 8   | CPX           | 43.81 | 1,802.40 | -     | 0      |
|         |                 |                    | 5   | 488280        | 78125 | 1        | SDDiP | 13.14  |
| SDDiP-1 | 5.71            | 2,025.49           |     |               |       |          | 100   | 1,204  |
| 2       | extSDDiP-II-0   | 7.76               |     |               |       | 1,780.95 | 29    | 0      |
|         | extSDDiP-II-1   | 3.66               |     |               |       | 1,730.56 | 35    | 4,815  |
|         | extSDDiP-II-2   | 3.53               |     |               |       | 1,703.66 | 37    | 4,831  |
| 4       | extSDDiP-II-0   | 6.41               |     |               |       | 1,629.26 | 10    | 0      |
|         | extSDDiP-II-1   | 24.18              |     |               |       | 1,864.58 | 4     | 20,673 |
|         | extSDDiP-II-2   | 26.63              |     |               |       | 1,862.54 | 4     | 18,764 |
| 8       | CPX             | 71.04              |     |               |       | 1,803.99 | -     | 0      |

**Table 13** Performance of Algorithm 1 at solving instances from Set 4 ( $\Sigma = 12, R = 3, b = 2$ ) of the SULLS problem

| $ \mathcal{V} $ | $ \mathcal{L}(1) $ | $G$ | Method        | Gap           | Time (s) | # ite    | # VI  |
|-----------------|--------------------|-----|---------------|---------------|----------|----------|-------|
| 265720          | 177147             | 1   | SDDiP         | 29.12         | 1,716.06 | 100      | 0     |
|                 |                    |     | 2             | extSDDiP-II-0 | 16.32    | 1,693.26 | 60    |
|                 |                    | 2   | extSDDiP-II-1 | 8.11          | 1,618.20 | 73       | 138   |
|                 |                    |     | extSDDiP-II-2 | 8.32          | 1,651.21 | 72       | 138   |
|                 |                    |     | 3             | extSDDiP-II-0 | 13.67    | 1,725.26 | 25    |
|                 |                    | 3   | extSDDiP-II-1 | 7.76          | 1,726.47 | 27       | 741   |
|                 |                    |     | extSDDiP-II-2 | 7.79          | 1,712.67 | 27       | 740   |
|                 |                    |     | 4             | extSDDiP-II-0 | 11.67    | 1,853.11 | 13    |
|                 |                    | 4   | extSDDiP-II-1 | 8.88          | 1,852.27 | 12       | 1,662 |
|                 |                    |     | extSDDiP-II-2 | 8.78          | 1,865.50 | 12       | 1,657 |
|                 |                    |     | 6             | extSDDiP-II-0 | 6.18     | 1,601.00 | 12    |
|                 |                    | 6   | extSDDiP-II-1 | 6.28          | 1,760.09 | 10       | 7,264 |
|                 |                    |     | extSDDiP-II-2 | 5.51          | 1,728.80 | 9        | 7,134 |
|                 |                    |     | 12            | CPX           | 53.78    | 1,803.29 | -     |

## Appendix E: Computational results on instances involving a large number of stages

This section provides the results of additional computational experiments carried out to assess the performance of the extSDDiP algorithm when using large values of  $G$ .

We used the procedure described in Subsection 5.1 of the manuscript to generate a new set of instances involving  $\Sigma = 20$  stages,  $b = 1$  period per stage and  $R \in \{2, 3\}$  realizations per stage. We solve these instances with the mathematical solver CPLEX using the extensive MILP formulation, with the SDDiP algorithm proposed by Zou et al. (2019) and with the extSDDiP-I/II-2 algorithm for values of  $G$  in the set  $\{2, 4, 5, 10\}$ . The results are reported in Table 14.

As already discussed in Subsection 5.3, we first note that increasing  $G$  from 1 to 2, 4 or 5 leads to a significant improvement in the solution quality. However, further increasing  $G$  to 10 leads to a degradation of the algorithmic performance. This can be seen in particular for the instances corresponding to  $R = 3$ : on average, for these instances, the extSDDiP-I/II-2 algorithm with  $G = 10$  provides solutions within a gap significantly larger than the one obtained using the SDDiP algorithm.

This might be explained as follows. When  $G$  is large, the extSDDiP algorithm decomposes the initial problem into a small number of large sub-problems. Solving each one of these sub-problems is computationally demanding so that the algorithm is able to perform only a limited number of iterations within the allotted time. Note e.g. how, on average, the extSDDiP-I/II-2 algorithm with  $G = 10$  is able to carry out only 11 iterations when solving instances with  $R = 3$  whereas the same algorithm solving the same instances with  $G = 2$  carries out an average of 286 iterations. This reduction in the number of iterations negatively impacts the quality of the approximate expected cost-to-go functions built over the course of the algorithm, and as a consequence, the quality of the lower and upper bounds obtained by the algorithm.

Note that this phenomenon is also observed in the results reported in Tables 2 and 11 for the instances of Set 2 involving  $R = 20$  realizations per stage. For these instances, increasing  $G$  from 2 to 3 negatively impacts the solution gap.

**Table 14** Performance of each method at solving instances with  $\Sigma = 20$  and  $b = 1$  of the SULLS problem

| $R$ | $ \mathcal{V} $ | $ \mathcal{L}(1) $ | $G$ | Method            | Gap               | Time (s) | # ite | # VI  |
|-----|-----------------|--------------------|-----|-------------------|-------------------|----------|-------|-------|
| 2   | 1,048,570       | 524,288            | 1   | SDDiP             | 20.74             | 2,381.83 | 116   | 0     |
|     |                 |                    | 2   | extSDDiP-I/II-0   | 16.21             | 1,171.41 | 151   | 0     |
|     |                 |                    |     | extSDDiP-I/II-1   | 4.96              | 1,114.92 | 219   | 105   |
|     |                 |                    |     | extSDDiP-I/II-2   | 8.37              | 1,188.19 | 216   | 105   |
|     |                 |                    | 4   | extSDDiP-I/II-0   | 15.23             | 1,700.43 | 56    | 0     |
|     |                 |                    |     | extSDDiP-I/II-1   | 5.63              | 1,288.44 | 95    | 639   |
|     |                 |                    |     | extSDDiP-I/II-2   | 5.67              | 1,282.92 | 142   | 737   |
|     |                 |                    | 5   | extSDDiP-I/II-0   | 11.98             | 1,820.73 | 42    | 0     |
|     |                 |                    |     | extSDDiP-I/II-1   | 6.53              | 1,565.08 | 72    | 1,102 |
|     |                 |                    |     | extSDDiP-I/II-2   | 6.17              | 1,553.27 | 103   | 1,495 |
|     |                 |                    | 10  | extSDDiP-I/II-0   | 6.51              | 1,240.04 | 13    | 0     |
|     |                 |                    |     | extSDDiP-I/II-1   | 7.05              | 1,396.39 | 20    | 3,978 |
|     |                 |                    |     | extSDDiP-I/II-2   | 6.45              | 1,430.71 | 25    | 4,390 |
|     |                 |                    | 20  | CPX               | 88.58             | 1,805.53 | -     | -     |
|     |                 |                    | 3   | $1.74 \cdot 10^9$ | $1.16 \cdot 10^9$ | 1        | SDDiP | 24.23 |
| 2   | extSDDiP-I/II-0 | 26.51              |     |                   |                   | 1,128.94 | 108   | 0     |
|     | extSDDiP-I/II-1 | 9.52               |     |                   |                   | 1,013.80 | 229   | 276   |
|     | extSDDiP-I/II-2 | 11.21              |     |                   |                   | 1,061.60 | 286   | 275   |
| 4   | extSDDiP-I/II-0 | 18.45              |     |                   |                   | 1,862.04 | 53    | 0     |
|     | extSDDiP-I/II-1 | 9.23               |     |                   |                   | 1,855.41 | 96    | 2,719 |
|     | extSDDiP-I/II-2 | 8.03               |     |                   |                   | 1,605.79 | 127   | 5,697 |
| 5   | extSDDiP-I/II-0 | 13.54              |     |                   |                   | 1,910.29 | 36    | 0     |
|     | extSDDiP-I/II-1 | 7.05               |     |                   |                   | 1,861.89 | 62    | 4,304 |
|     | extSDDiP-I/II-2 | 9.57               |     |                   |                   | 1,829.56 | 60    | 4,201 |
| 10  | extSDDiP-I/II-0 | 75.37              |     |                   |                   | 1,787.26 | 10    | 0     |
|     | extSDDiP-I/II-1 | 71.60              |     |                   |                   | 1,877.45 | 12    | 0     |
|     | extSDDiP-I/II-2 | 61.54              |     |                   |                   | 1,773.12 | 11    | 0     |
| 20  | CPX             | -                  |     |                   |                   | -        | -     | -     |

---

## References

- Barany I, Van Roy TJ, Wolsey LA (1984) Strong formulations for multi-item capacitated lot sizing. *Management Science* 30(10):1255–1261.
- Guan Y, Ahmed S, Miller AJ, Nemhauser GL (2006a) On formulations of the stochastic uncapacitated lot-sizing problem. *Operations Research Letters* 34(3):241–250.
- Guan Y, Ahmed S, Nemhauser GL (2009) Cutting planes for multistage stochastic integer programs. *Operations Research* 57(2):287–298.
- Guan Y, Ahmed S, Nemhauser GL, Miller AJ (2006b) A branch-and-cut algorithm for the stochastic uncapacitated lot-sizing problem. *Mathematical Programming* 105(1):55–84.
- Zou J, Ahmed S, Sun XA (2019) Stochastic dual dynamic integer programming. *Mathematical Programming* 175(1-2):461–502.
